# Supplementary material
Source: PubMed Central journal article supplement (PMC7161704)
Supplement: NIHMS1579263-supplement-1.pdf [file NIHMS1579263-supplement-1.pdf]

Supplemental table. Procedure and diagnosis codes.

| Surgery type            | Procedure ICD-9 Code | Cancer diagnosis ICD-9 code                                               |
|-------------------------|----------------------|---------------------------------------------------------------------------|
| Cystectomy              | 57.71, 57.79         | 188.0, 188.1, 188.2, 188.3, 188.4, 188.5, 188.6, 188.7, 188.8, 188.9      |
| Pancreaticoduodenectomy | 52.5                 | 157.0, 157, 157.1, 157.2, 157.3, 157.4, 157.5, 157.6, 157.7, 157.8, 157.9 |
| Gastrectomy             | 43.5-43.9            | 151.0-151.9                                                               |
| Esophagectomy           | 42.40, 43.99         | 150.9, 150, 150.0, 150.1, 150.2, 150.3, 150.4, 150.5, 150.8, 150.9        |
